# Supplementary material for: Pain, cognition and disability in advanced multiple sclerosis
Source: publisher site journal article supplement (doi:10.1515/sjpain-2021-0067), 2021-09-01
Supplement: Supplementary file 1 [file j_sjpain-2021-0067_suppl.docx]

Table S1.Means (M) and standard deviations (SD) concerning episodic memory and executive functions.

|  | **MS patients** | |
| --- | --- | --- |
|  | M | SD |
| **Episodic memory** |  |  |
| Eight words – Immediate Recall | 31.05 | 5.61 |
| Eight words – Delayed Recall | 5.12 | 2.41 |
| Eight words Recognition | 15.00 | 1.72 |
| RBMT faces | 15.98 | 5.79 |
| RBMT pictures | 36.89 | 5.36 |
|  |  |  |
| **Executive functions** |  |  |
| Digit Span Backward | 5.33 | 1.91 |
| Rule Shift task | 2.91 | .90 |
| Category Fluency | 33.93 | 10.60 |

RBMT = Rivermead Behavioural Memory Test; MS = Multiple Sclerosis

Table S2.Means (M) and standard deviations (SD) concerning the scores on pain intensity and pain affect at time of testing.

|  | | **Pain Intensity** | | **Pain Affect** | |
| --- | --- | --- | --- | --- | --- |
| **Pain scales** | Max. score | M | SD | M | SD |
| **CAS Intensity** | 10 | 3.16 | 2.64 |  |  |
| **FPS** | 6 | 1.63 | 1.34 |  |  |
| **CAS Affect** | 10 |  |  | 2.67 | 2.65 |
| **NWC-A** | 15 |  |  | 2.79 | 3.01 |

CAS = Coloured Analogue Scale; FPS = Faces Pain Scale; NWC-A = Number of Words Chosen-Affective**.**

Table S3.Means (M) and standard deviations (SD) concerning the scores on mood of the MS patients.

|  | **MS patients** | | |
| --- | --- | --- | --- |
| **Mood scales** | M | SD | Max. score |
| BDI | 11.09 | 7.01 | 63 |
| SCL-90 anxiety | 13.22 | 4.09 | 40 |
| SCL-90 depression | 25.91 | 9.55 | 52 |

BDI = Beck Depression Inventory; SCL-90 = Symptom Check List-90; MS = Multiple Sclerosis.

Table S4**.** Percentages of physical comorbidity categories in MS patients.

|  | **MS patients** | | | |
| --- | --- | --- | --- | --- |
|  | **%** | | | |
| **Physical comorbidities** | **1** | **2** | **3** | **4** |
| Cardiovascular diseases | 37.8 | 8.9 | 2.2 | 2.2 |
| Endocr/metabol. diseases | 11.1 |  |  |  |
| Neurological disorders | 33.3 | 2.2 |  |  |
| Eye disorders | 13.3 | 2.2 |  |  |
| Infections | 24.4 | 2.2 |  |  |
| Respiratory disorders | 33.3 | 15.6 | 4.4 |  |
| Musculoskeletal disorders | 6.7 |  | 2.2 |  |
| Psychiatric disorders | 6.7 |  |  |  |

MS = Multiple Sclerosis
